# Supplementary material for: Self-detachable UV-curable polymers for open-access microfluidic platforms
Source: Royal Society of Chemistry journal article supplement (doi:10.1039/d0lc00604a), 2020-01-01
Supplement: d0lc00604a1.pdf [file d0lc00604a1.pdf]

## Supplementary Information for

### Self-detachable UV-curable polymers for open-access microfluidic platforms

Dongha Tahk,<sup>†\*a</sup> Seokyoung Bang,<sup>†b</sup> Sujin Hyung,<sup>a</sup> Jungeun Lim,<sup>a</sup> James Yu,<sup>c</sup> Jinhyun Kim,<sup>b</sup> Noo Li Jeon<sup>\*acde</sup> and Hong Nam Kim,<sup>\*bf</sup>

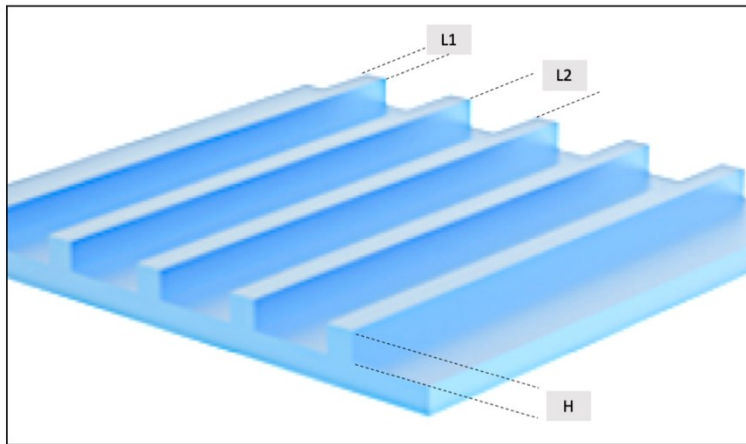

| Type          | L1 (nm) | L2 (nm) | H (nm) |
|---------------|---------|---------|--------|
| 400 nm<br>1:1 | 400     | 400     | 400    |
| 400 nm<br>1:5 | 400     | 2000    | 400    |
| 800 nm<br>1:1 | 800     | 800     | 800    |
| 800 nm<br>1:5 | 800     | 4000    | 800    |

**Supplementary Figure S1.** Schematic diagram of the nanopattern. The feature size of the nanopatterns used in the analysis. L1: width of the nanopattern, L2: space between the nanopatterns, and H: height of the nanopattern. The details are summarized in the table. Every nanopattern has the same aspect ratio, 1:1.

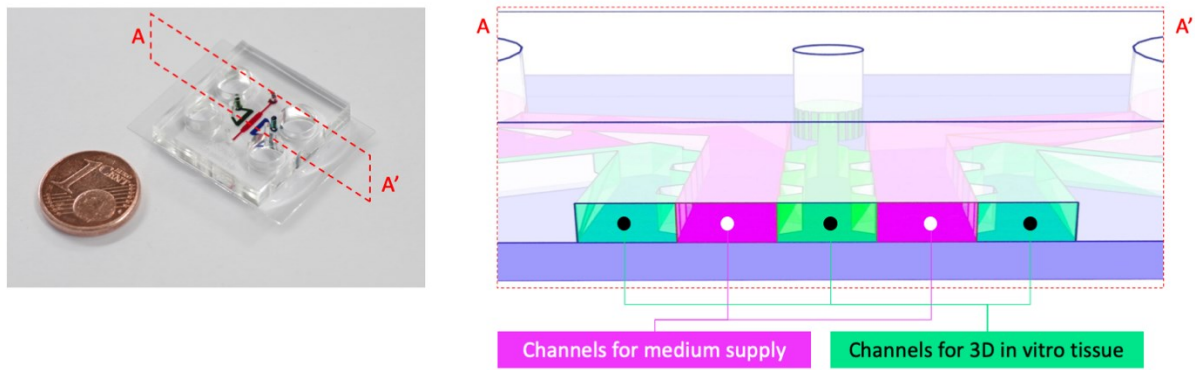

**Supplementary Figure S2.** Schematic diagram of the microfluidic device used in the Figure 5C. The microfluidic device in Figure 5C consists of five channels. All of these channels exist on one layer. This device is used for 3D in vitro tissue culture. Figure 5C shows that the channel loaded with pink dye is where the hydrogel and cells are mixed (green channels in this schematic diagram). The remaining channels (connected to four large inlet/outlet holes) supply cell culture media. Each channel is physically located side-by-side, but independent liquid patterning is possible for each channel.
